# Supplementary material for: Narrative Identity at the End of Life: A Qualitative Analysis of Dignity Therapy Interviews from an Existential Perspective
Source: Research Square preprint supplement (doi:10.21203/rs.3.rs-6529660/v1), 2025-05-08
Supplement: Supplementary file 1 [file 7a7ceec60c6fb81479dcf1f0.docx]

**Table 2.** Model of Identity: Outward categories, themes, and subthemes

| *idem* | **Origin** | - Geography |  |
| --- | --- | --- | --- |
|  |  | - Values and belief systems |  |
|  |  | - Family history |  |
|  |  | Quote: «*I grew up with my grandmother who was a strong woman. She taught me that courage is the root of change. She used to say, that we are not what we are made of but who we’re capable of becoming*» [IDgzt260]. | |
|  | **Family** | - Childhood | - Parental influence - Attachment - Self-esteem - Lifestyle - Socialization - Influential figure - Friction with roots - (Adverse) childhood experiences - Socioeconomic status |
|  |  | - Siblings | - Connection |
|  |  | - Romantic | - Encounter - Unity - Discord - Impact |
|  |  | - Children | - Facts - Accord - Discord - Parental role - Responsibility - Meaning and purpose |
|  |  | - Close relatives | - Connection - Support - Conflicts |
|  |  | Quote: «*I like to remember my childhood. I grew up in a house with a garden and spent a lot of time outside. I had a lot of arguments with my mom because she’s just as stubborn as I am. Things got better when I moved out. I also have a younger sister, and when we were kids, I often had to take her with me when I went out, which, especially in my teenage years, wasn’t always something I wanted to do. But I did take her sometimes with me, and the older I got, the closer we became. Now, we have a really good and close relationship, which is wonderful. It’s very hard for her that I am sick. I can tell, and it really hurts me to see her suffering like that…»* [ID ugr520].  Quote: «*I was married for over 20 years, and at first, I thought it was a good relationship. But the unfulfilled desire for children really overshadowed everything, and it was one of the reasons the relationship fell apart. My husband was very dominant – controlled everything, and I just went along with it. That time isn’t a particular happy memory, but it’s an important one for me. I made me realize I couldn’t keep going like that, so I moved out. By then, I had already met my current partner, who helped me make that decision. I took me a while to fully commit, but once I did, there was no turning back, and I stuck to it. From then on, I had mostly good times but our time was short. I just hope we can share many more happy moments together*…» [taa000].  Quote: *«I lost my mom when I was nine and spent a lot of time alone. The losses just kept coming. When I was 38, I lost my 16-year-old son in an accident. I’d stayed in an unhappy marriage for 16 years, just for my son’s sake and after he passed, I went through a terrible divorce. Then, only five months later, my sister died, too. Those were the hardest and most difficult years of my life. I was completely lost, struggling with depression for a long time – until I met my current partner. From then on, my life got better, but our time was short (...). Looking back, it’s just part of my story, part of life. It taught me that we shouldn’t get stuck in the past, and we shouldn’t let the bad things define us. Instead, we can use them as strength. It’s made me stronger and more independent (…)* » [ID: aqv063]. | |
| *ipse* | **Movement** | - Departure - Interim - Arrival |  |
|  |  | *Quote*: «*And then, at some point, I ended up in Switzerland – all because of love (laughs). It was in 1983, on a beautiful late-July day. I was doing an internship in Switzerland and had the chance to leave work early. I went to a spot by the water, planning to swim. That’s when I noticed her nearby, and that’s when everything changed. Meeting my wife was one of the most significant moments of my life…*» [hpx197]. | |
|  | **Societal** | - Amical |  |
|  |  | - Position |  |
|  |  | - Social safety/protection |  |
|  |  | - Support |  |
|  |  | Quote*:* «*I have to admit, it’s not always easy. As a retired person, you sometimes feel like you’re no longer wanted. That’s the reality – in the eyes of others, you’re just an old man*» [ID blh566]. | |
|  | **Work** | - Education |  |
|  |  | - Transition to working life |  |
|  |  | - Activity |  |
|  |  | - Daily structure |  |
|  |  | - Social contact |  |
|  |  | - Satisfaction/dissatisfaction |  |
|  |  | - Code of ethics at work |  |
|  |  | - Meaning and purpose |  |
|  |  | Quote*:* «*I’m in a leadership position and wants every one of my colleagues to feel valued and treated with respect. I don’t care whether someone is my friend or not; what matters is what’s best for the business. When things run smoothly, there’s less trouble, and it’s easier to support my colleagues. Working together is far more effective than working against each other, and it brings you closer to your goals. I always say: together*» [ID jwi555]. | |
|  | **Recreation** | - Social gatherings | - Connections |
|  |  | - Travel & sports | - Self-esteem |
|  |  | - Nature | - Peace |
|  |  | - Art & languages | - Inspiration |
|  |  | Quote*:* «*I owe a small garden plot, something I had to fight for. It has become my sanctuary – going there, trimming the roses, pulling out the weeds, drinking coffee, and simply sitting in the sun, it’s like therapy*!» [egv504]. | |
|  | **Disruption** | - Illness | - Diagnosis - Illness experience - Suffering and pain - Losses (function, autonomy, independence, joy) - Induced change - Uncertainty - Limitation - What’s ahead |
|  |  | - Intrusion of the unexpected that changed everything | - Confusion - Loss of meaning and purpose - Anxieties - Death anguish - Distress - Suffering |
|  |  | - Struggle |  |
|  |  | - Conflicts |  |
|  |  | - Accident |  |
|  |  | - Other’s illness & losses |  |
|  |  | Quote*:* «*Unfortunately, all of my hobbies required good lung capacity, which I no longer have. When I used to have a bad day, I could go for a run and I’d feel better. Or I’d go biking, into nature or the mountains, to clear my mind. It’s hard when all of that is taken away in an instant, and you have to discover what can still be beneficial and bring you comfort*» [ID ugr520]. | |
|  | **Experience of the now** | - Impermanence of life |  |
|  |  | - Confrontation with end of life |  |
|  |  | - Managing disease and illness progression |  |
|  |  | - Existential loneliness |  |
|  |  | - Double awareness |  |
|  |  | - Living and dying with dignity |  |
|  |  | Quote:«*I had a breakdown, burnout. This was the turning point. That’s when I realized, this isn’t working. If you put all your eggs in one basket, it’s not going to work because the basket falls over, and everything breaks. You end up with nothing. That’s when I started with theater, and then later, with gardening. That’s the best. Finding something that fulfills you (searches for words), I think that’s the way to go. I wish I had figured this out years ago (…). I think a lot of things would have been more stable, calmer, and probably more relaxed if I’d understood this earlier – if I’d approached things differently. But, well, better late than never.* *I just want to live life as normally as I can, the best I can. And I’m proud of the fact that I’ve accepted my illness*» [mta814]. | |

**Table 3.** Model of Identity: Inward categories, themes, and subthemes

| *Narrative identity* | **Feelings** | - Positive | - Unified - Strong - Independent - Responsible - Proud - Loving & being loved - Feeling cared for, hold and supported - Happy & satisfied - Hopeful - Resilient & optimistic - Grateful & humble - Peaceful & relieved - Carefree - Accepting & trusting - Free - Secure & protected - Validated - Indulging, conciliative |
| --- | --- | --- | --- |
|  |  | Quote: «*I am not giving up now. One should never give up. One should always fight and make the best out of the situation. It’s important to accept things as they are – whether it’s a tragedy or an illness. Don’t let yourself be beaten down. Keep moving forward and make the best of it*» [ID fls605]. | |
|  |  | - Negative | - Doubtful & insecure - Worried & afraid - Distressed - Suffering - Sorrow - Lacking love & affection - Lonely - Sad & hurt - Disappointed - Regretful - Frustrated - Angry - Unjust - Dependent - Guilty & pressured |
|  |  | Quote: «*This time, I have more issues to deal with my illness than before. That’s probably due to my current life situation, which is different from the past. I have a partner now, whom I love and with whom I wish to plan a future, maybe even start a family. On the professional side too, I have graduated, I have a good job, and I’m ready to take on something bigger... This time, I’m struggling more than eight years ago. I feel more vulnerable because, right now, I have so much more to lose*» [coz186].  Quote: *«My family understands my suffering, but they don’t understand why I want to die (pause). They’re really scared of losing me. They’re not ready to let go (tears in her eyes). It’s really hard, really sad for everyone. I want to die – also for my family. Because my family needs normality. And right now, there’s no normality, it’s like temporary insanity (…). My daughter cried a lot and said, ‘Mom, you’re not doing well, and you’re not going to get better... but we still need you’. My daughter is strong, but my son is in his teenage years. It hurts me too, thinking about leaving them (struggling with inner conflicts) – I’m just not ready to die yet. I’m not ready, and I want to be there for my children as long as I can»* [ID btl539]. | |
|  | **Sense of Self** | - Character | - Priorities & longings - Care & protection - Empathy - Balance & control - Limitation - Continuity of self - Authenticity - Integrity - Self-reflection |
|  |  | - Resources | - Presence - Accept change - Take charge - Be responsible - Agency and control - Strength & perseverance - Self-care & preservation - Luck & bounty - Emotional connections - Build up hope - Spirituality |
|  |  | - Pride | - Of self - Of others |
|  |  | - Purpose | - Achievements - Be of help - Connections - Meaningful tasks - Legacy |
|  |  | - Lessons learned & principles | - Independence & autonomy - Speaking up - Courage & self-realization - Honesty - Solidarity & trust - Justice - Respect - Patience - Reciprocity - Pleasure - Love - Friendships |
|  |  | Quote: « *This illness has opened my eyes to life and made me appreciate things more – things I no longer have or that have changed. It’s made me realize that it could be over in an instant. So now, I live more day by day and enjoy each day a little more than before. It sounds simple, but there’s something deeply true about it: it takes difficult situations to truly appreciate the good and beautiful aspects of life. And this is what has happened with our family – the illness has brought us closer, taught us help each other, care for one another, and enjoy life… This illness has really put me on the right path, especially in the way I think*... *I just hope we can share many more happy moments together…*» [ID: aqv063].  Quote: « *How do you deal with it when you realize the disease is getting worse, and life is slowly coming to an end? It’s the uncertainty about how the disease and death are going to unfold that really scares me (...). What if I can’t do this or that anymore? What if I become a burden to everyone? I know, in the end, everyone has to go – sooner or later. But that’s something I really don’t want. It would be less frightening if we could just leave whenever we wanted. I’m not really religious, but something has given me the strength to face it. Things that have happened in my life, including my illness, have made me question religion. But I still believe that when someone passes away, something still remains, and you can feel that connection. This belief has given me something to hold onto, helping me get through all of this…*…» [ID mbb616].  Quote: «*Life taught me to be patient, to wait for certain things. I have to admit, I was very impatient in my youth, especially in relationships. I think that’s one of the most important lessons I’ve learned in life: to observe carefully and not dismiss things too quickly. When a problem arises, when something blocks me or stands in my way, I’ve learned to stay calm and simply wait and see*» [ID blh566]. | |
|  | **Future** | - Hopes - Wishes - Needs - Concerns, worries - Responsibilities - Forgiveness & reconciliation - Resolution & closure - Dignity - Inner growth, transformation - Transcendence - End of life & approaching death |  |
|  |  | Quote: «*I hope they’ll stay healthy and flourish, somehow – free form life’s hardships as much as possible… I mean in life, you’re never fully protected or unharmed… and they should know that I love them more than anything. That’s the most important thing. I hope I still have enough time to be part of my kids’ lives, watch them grow into their careers, and see them start their own families*…» [ID gui159]. | |
